# Supplementary material for: Age-dependent regulation of obesity and Alzheimer-related outcomes by hormone therapy in female 3xTg-AD mice
Source: PubMed Central journal article supplement (PMC5456100; doi:10.1371/journal.pone.0178490), 2017-06-02

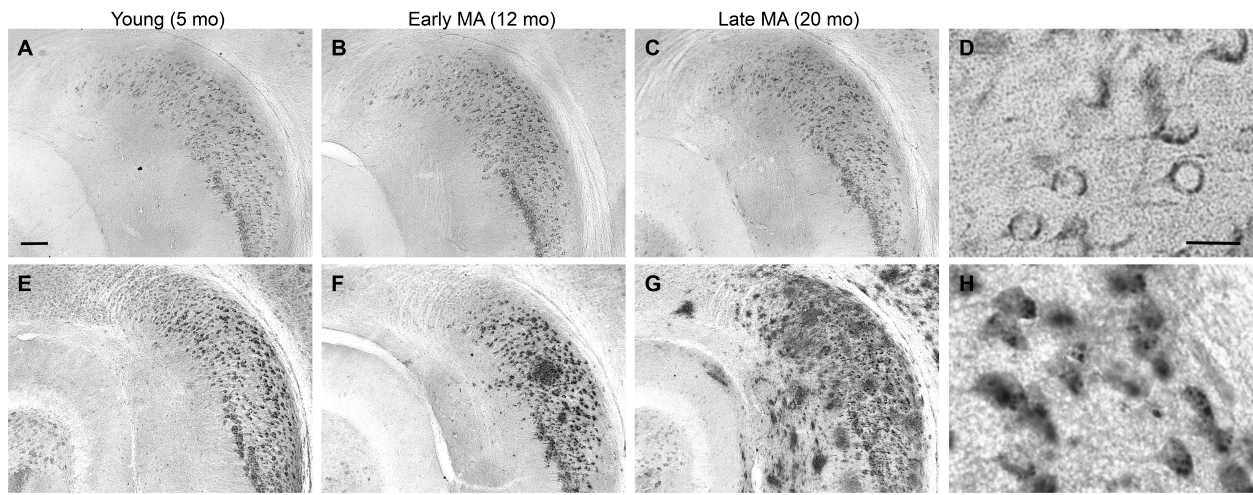

Supplement: pone.0178490.s001.pdf [file pone.0178490.s001.pdf]
