# Supplementary material for: Age-dependent regulation of obesity and Alzheimer-related outcomes by hormone therapy in female 3xTg-AD mice
Source: PubMed Central journal article supplement (PMC5456100; doi:10.1371/journal.pone.0178490), 2017-06-02

Early MA (12 mo)

Late MA (20 mo)

Normal Fat

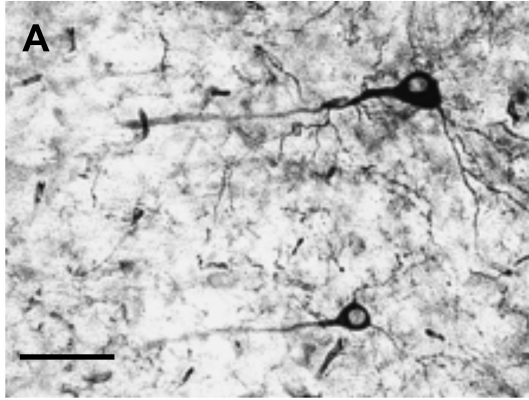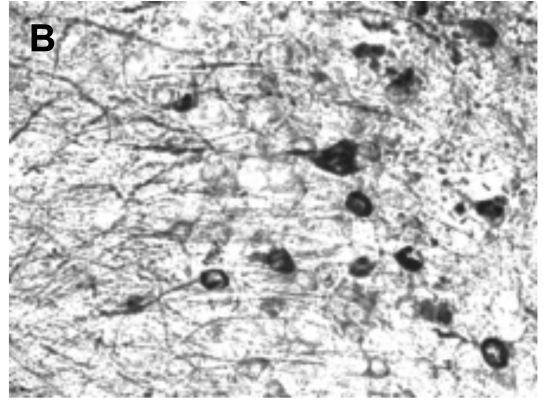

High Fat

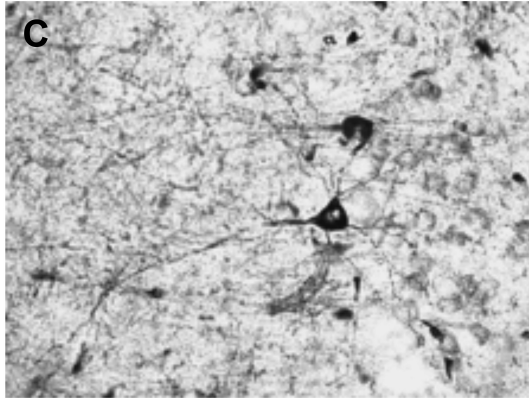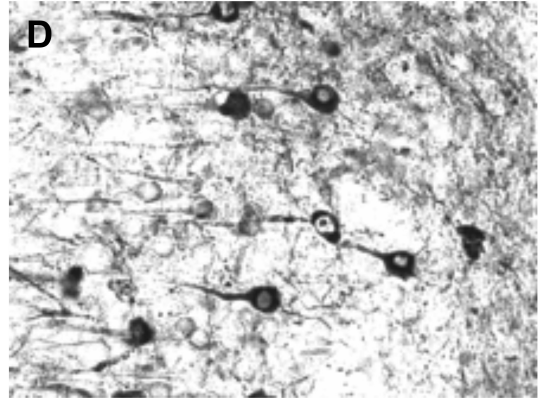

Supplement: pone.0178490.s002.pdf [file pone.0178490.s002.pdf]
